# Supplementary material for: MATE1 Deficiency Exacerbates Dofetilide-Induced Proarrhythmia
Source: MDPI journal article supplement (doi:10.3390/ijms23158607), 2022-08-03
Supplement: s1 [file s1]

# MATE1 Deficiency Exacerbates Dofetilide-Induced Proarrhythmia

Muhammad Erfan Uddin <sup>1</sup>, Eric D. Eisenmann <sup>1</sup>, Yang Li <sup>1</sup>, Kevin M. Huang <sup>1</sup>, Dominique A. Garrison <sup>1</sup>, Zahra Talebi <sup>1</sup>, Alice A. Gibson <sup>1</sup>, Yan Jin <sup>1</sup>, Mahesh Nepal <sup>1</sup>, Ingrid M. Bonilla <sup>2</sup>, Qiang Fu <sup>1</sup>, Xinxin Sun <sup>1</sup>, Alec Millar <sup>3</sup>, Mikhail Tarasov <sup>3</sup>, Christopher E. Jay <sup>4</sup>, Xiaoming Cui <sup>5</sup>, Heidi J. Einolf <sup>5</sup>, Ryan M. Pelis <sup>5</sup>, Sakima A. Smith <sup>6,7</sup>, Przemysław B. Radwański <sup>3,7</sup>, Douglas H. Sweet <sup>4</sup>, Jörg König <sup>8</sup>, Martin F. Fromm <sup>8</sup>, Cynthia A. Carnes <sup>3,7,9</sup>, Shuiying Hu <sup>3</sup> and Alex Sparreboom <sup>1,\*</sup>

<sup>1</sup> Division of Pharmaceutics and Pharmacology, College of Pharmacy and Comprehensive Cancer Center, The Ohio State University, Columbus, OH 43210, USA; uddin.33@osu.edu (M.E.U.); eisenmann.11@buckeyemail.osu.edu (E.D.E.); li.10991@osu.edu (Y.L.); huang.2834@buckeyemail.osu.edu (K.M.H.); garrison.220@buckeyemail.osu.edu (D.A.G.); talebi.9@osu.edu (Z.T.); gibson.972@osu.edu (A.A.G.); jin.1134@osu.edu (Y.J.); nepal.17@osu.edu (M.N.); pkpdfu@gmail.com (Q.F.); xinxin224@gmail.com (X.S.)

<sup>2</sup> Department of Physiology and Cell Biology, College of Medicine, The Ohio State University, Columbus, OH 43210, USA; ingrid.bonilla4@upr.edu

<sup>3</sup> Division of Outcomes and Translational Sciences, College of Pharmacy, The Ohio State University, Columbus, OH 43210, USA; alec.miller@midwestern.edu (A.M.); tarasov.4@osu.edu (M.T.); radwanski.2@osu.edu (P.B.R.); carnes.4@osu.edu (C.A.C.); hu.1333@osu.edu (S.H.)

<sup>4</sup> Department of Pharmaceutics, School of Pharmacy, Virginia Commonwealth University, Richmond, VA 23298, USA; jayce@mymail.vcu.edu (C.E.J.); dsweet@vcu.edu (D.H.S.)

<sup>5</sup> Novartis Institute for Biomedical Research, East Hanover, NJ 07936, USA; xiaoming.cui@novartis.com (X.C.); heidi.einolf@novartis.com (H.J.E.); ryan.pelis@novartis.com (R.M.P.)

<sup>6</sup> OSU Wexner Medical Center, Department of Internal Medicine, Division of Cardiovascular Medicine, The Ohio State University, Columbus, OH 43210, USA; sakima.smith@osumc.edu

<sup>7</sup> Dorothy M. Davis Heart and Lung Research Institute, The Ohio State University, Columbus, OH 43210, USA

<sup>8</sup> Institute of Experimental and Clinical Pharmacology and Toxicology, Friedrich-Alexander-Universität Erlangen-Nürnberg, 91054 Erlangen, Germany; joerg.koenig@fau.de (J.K.); martin.fromm@fau.de (M.F.F.)

<sup>9</sup> Division of Pharmacy Practice and Science, College of Pharmacy, The Ohio State University, Columbus, OH 43210, USA

\* Correspondence: sparreboom.1@osu.edu

## This PDF file includes

Tables S1 to S5

Figures S1 to S4

**Table S1. Pharmacokinetic parameters of dofetilide after i.v. administration (2.5 mg/kg) in mice.**

| Group                 | C <sub>max</sub><br>(ng/ml) | C <sub>max</sub><br>(Fold-change) | AUC <sub>last</sub><br>(ng×h/ml) | AUC <sub>last</sub><br>(Fold-change) |
|-----------------------|-----------------------------|-----------------------------------|----------------------------------|--------------------------------------|
| <b>Female</b>         |                             |                                   |                                  |                                      |
| Wild-type             | 1640 ± 170                  |                                   | 673 ± 28.0                       |                                      |
| OCT1/2 <sup>-/-</sup> | 1960 ± 126                  | 1.29                              | 756 ± 47.0                       | 1.19                                 |
| MATE1 <sup>-/-</sup>  | 1520 ± 149                  | 0.93                              | 635 ± 61.0                       | 0.94                                 |
| <b>Male</b>           |                             |                                   |                                  |                                      |
| Wild-type             | 1540 ± 131                  |                                   | 587 ± 29.4                       |                                      |
| OCT1/2 <sup>-/-</sup> | 1120 ± 113                  | 0.81                              | 461 ± 23.0                       | 0.76                                 |
| MATE1 <sup>-/-</sup>  | 1380 ± 112                  | 0.90                              | 603 ± 28.5                       | 1.03                                 |

Data represent mean ± SEM.

*Abbreviations:* C<sub>max</sub>, peak plasma concentration; AUC<sub>last</sub>, area under the plasma concentration-time curve to the last measurable concentration.

**Table S2. Influence of contraindicated drugs on the pharmacokinetic parameters of dofetilide (5 mg/kg) in female mice.**

| Concurrent treatment              | C <sub>max</sub><br>(ng/ml) | C <sub>max</sub><br>(Fold-change) | AUC <sub>last</sub><br>(ng×h/ml) | AUC <sub>last</sub><br>(Fold-change) |
|-----------------------------------|-----------------------------|-----------------------------------|----------------------------------|--------------------------------------|
| <b>None</b>                       |                             |                                   |                                  |                                      |
| Wild-type                         | 191 ± 13.0                  |                                   | 329 ± 24.5                       |                                      |
| OCT1/2 <sup>-/-</sup>             | 218 ± 18.0                  | 1.14                              | 362 ± 25.0                       | 1.10                                 |
| MATE1 <sup>-/-</sup>              | 276 ± 45.4                  | 1.44                              | 346 ± 37.0                       | 1.05                                 |
| <b>Bictegravir (30 mg/kg)</b>     |                             |                                   |                                  |                                      |
| Wild-type                         | 365 ± 72.0*                 | 1.91                              | 595 ± 194*                       | 1.81                                 |
| OCT1/2 <sup>-/-</sup>             | 282 ± 132                   | 1.47                              | 354 ± 46.4                       | 1.08                                 |
| MATE1 <sup>-/-</sup>              | 383 ± 86.4*                 | 2.00                              | 614 ± 77.0*                      | 1.87                                 |
| <b>Cimetidine (100 mg/kg)</b>     |                             |                                   |                                  |                                      |
| Wild-type                         | 656 ± 81.3***               | 3.43                              | 1400 ± 183***                    | 4.25                                 |
| OCT1/2 <sup>-/-</sup>             | 420 ± 89.4**                | 2.20                              | 1270 ± 150***                    | 3.86                                 |
| MATE1 <sup>-/-</sup>              | 625 ± 92.2***               | 3.27                              | 1400 ± 89.5***                   | 4.27                                 |
| <b>Ketoconazole (50 mg/kg)</b>    |                             |                                   |                                  |                                      |
| Wild-type                         | 315 ± 34.0*                 | 1.64                              | 588 ± 64.0**                     | 1.79                                 |
| OCT1/2 <sup>-/-</sup>             | 475 ± 61.5**                | 2.48                              | 1090 ± 128***                    | 3.31                                 |
| MATE1 <sup>-/-</sup>              | 455 ± 32.0***               | 2.38                              | 938 ± 181***                     | 2.85                                 |
| <b>Trimethoprim (100 mg/kg)</b>   |                             |                                   |                                  |                                      |
| Wild-type                         | 264 ± 27.0                  | 1.38                              | 428 ± 25.4                       | 1.30                                 |
| OCT1/2 <sup>-/-</sup>             | 220 ± 38.0                  | 1.15                              | 440 ± 76.0                       | 1.34                                 |
| MATE1 <sup>-/-</sup>              | 212 ± 45.0                  | 1.11                              | 345 ± 29.3                       | 1.05                                 |
| <b>Verapamil (10 mg/kg)</b>       |                             |                                   |                                  |                                      |
| Wild-type + Verapamil             | 518 ± 47.0***               | 2.71                              | 602.0 ± 35.0*                    | 1.83                                 |
| OCT1/2 <sup>-/-</sup> + Verapamil | 519 ± 42.4***               | 2.71                              | 669.0 ± 42.0**                   | 2.04                                 |
| MATE1 <sup>-/-</sup> + Verapamil  | 384 ± 58.0**                | 2.01                              | 638.0 ± 26.5**                   | 1.94                                 |

Data represent mean  $\pm$  SEM. \*P < 0.05, \*\*P < 0.01, \*\*\*P < 0.001 versus single agent dofetilide.

Abbreviations: C<sub>max</sub>, peak plasma concentration; AUC<sub>last</sub>, area under the plasma concentration-time curve to the last measurable concentration.

**Table S3. Influence of ketoconazole or verapamil on the pharmacokinetics of dofetilide (5 mg/kg) in male mice.**

| Concurrent treatment                    | C <sub>max</sub><br>(ng/ml) | C <sub>max</sub><br>(Fold-change) | AUC <sub>last</sub><br>(ng×h/ml) | AUC <sub>last</sub><br>(Fold-change) |
|-----------------------------------------|-----------------------------|-----------------------------------|----------------------------------|--------------------------------------|
| <b>None</b>                             |                             |                                   |                                  |                                      |
| Wild-type                               | 151 $\pm$ 8.80              |                                   | 278 $\pm$ 12.3                   |                                      |
| OCT1/2 <sup>-/-</sup>                   | 191 $\pm$ 23.4              | 1.26                              | 351 $\pm$ 36.0                   | 1.26                                 |
| MATE1 <sup>-/-</sup>                    | 235 $\pm$ 50.0*             | 1.55                              | 407 $\pm$ 32.6**                 | 1.46                                 |
| <b>DDI with Ketoconazole (50 mg/kg)</b> |                             |                                   |                                  |                                      |
| Wild-type                               | 415 $\pm$ 43.0***           | 2.75                              | 728 $\pm$ 55.4***                | 2.62                                 |
| OCT1/2 <sup>-/-</sup>                   | 453 $\pm$ 65.0***           | 3.00                              | 1050 $\pm$ 142***                | 3.77                                 |
| MATE1 <sup>-/-</sup>                    | 509 $\pm$ 62.2***           | 3.36                              | 894 $\pm$ 92.0***                | 3.21                                 |
| <b>DDI with Verapamil (10 mg/kg)</b>    |                             |                                   |                                  |                                      |
| Wild-type                               | 181 $\pm$ 32.0              | 1.20                              | 259 $\pm$ 18.3                   | 0.93                                 |
| OCT1/2 <sup>-/-</sup>                   | 148 $\pm$ 32.0              | 0.98                              | 328 $\pm$ 52.0                   | 1.18                                 |
| MATE1 <sup>-/-</sup>                    | 246 $\pm$ 38.4              | 1.63                              | 406 $\pm$ 38.0                   | 1.46                                 |

Data represent mean  $\pm$  SEM. \*P < 0.05, \*\*P < 0.01, \*\*\*P < 0.001 vs single agent dofetilide.

Abbreviations: C<sub>max</sub>, peak plasma concentration; AUC<sub>last</sub>, area under the plasma concentration-time curve to the last measurable concentration.

**Table S4. Observed and predicted pharmacokinetic parameters of dofetilide with the presence and absence of cimetidine and ketoconazole.**

|                                                     | Mean C <sub>max</sub> ± SD (CV%)<br>(ng/mL) |             | Mean AUC <sub>0-last</sub> ± SD (CV%)<br>(ng×h/mL) |            | Mean CL ± SD (CV%)<br>(L/h)      |          |
|-----------------------------------------------------|---------------------------------------------|-------------|----------------------------------------------------|------------|----------------------------------|----------|
|                                                     | Predicted                                   | Observed    | Predicted                                          | Observed   | Predicted                        | Observed |
| Dofetilide (0.5 mg<br>BID, p.o.)                    | 2.48 ± 0.58 (23)<br>PE = +32.66%            | 1.87 ± 0.65 | 18.0 ± 3.38 (19)<br>PE = +2.91%                    | 17.5 ± 3.2 | 28.8 ± 6.05 (21)<br>PE = +30.8%  | 22.0     |
| Dofetilide (0.5 mg<br>i.v. infusion over<br>90 min) | 4.28 ± 0.52 (12)<br>PE = +38.06%            | 3.1 ± 0.50  | 20.4 ± 3.92 (19)<br>PE = -3.92%                    | 21.2 ± 4.5 | 25.4 ± 4.94 (19)<br>PE = +40.48% | 18.1     |
| <b>DDI with Cimetidine 400 mg BID (p.o.)</b>        |                                             |             |                                                    |            |                                  |          |
| Dofetilide<br>(0.5 mg, p.o.)                        | 2.84 ± 0.53 (19)<br>PE = +25.7%             | 2.26        | 19.6 ± 3.66 (19)<br>PE = +12.6%                    | 17.4       | 26.4 ± 5.36 (20)<br>PE = +28.2%  | 20.6     |
| Dofetilide +<br>Cimetidine                          | 3.98 ± 0.70 (18)<br>PE = +15.7%             | 3.44        | 32.4 ± 6.76 (21)<br>PE = +17.9%                    | 27.5       | 16.1 ± 3.79 (23)<br>PE = +39.1%  | 11.6     |
| % Change                                            | 40.1% ↑                                     | 52.2% ↑     | 65.5% ↑                                            | 58.0% ↑    | 38.9% ↓                          | 43.7% ↓  |
| <b>DDI with Ketoconazole 400 mg QD (p.o.)</b>       |                                             |             |                                                    |            |                                  |          |
| Dofetilide<br>(0.5 mg, p.o.)                        | 2.87 ± 0.52 (18)<br>PE = +27.0%             | 2.26        | 19.9 ± 3.69 (19)<br>PE = +14.3%                    | 17.4       | 26.0 ± 5.20 (20)<br>PE = +26.3%  | 20.6     |
| Dofetilide +<br>Ketoconazole                        | 3.70 ± 0.73 (20)                            | -           | 28.1 ± 6.17 (22)                                   | -          | 18.7 ± 4.68 (25)                 | -        |
| % Change                                            | 28.9% ↑                                     | 53.0% ↑     | 41.1% ↑                                            | 41.0% ↑    | 28.0% ↓                          | -        |

*Abbreviations:* p.o., per oral; BID, twice per day; QD, once a day, C<sub>max</sub>, peak plasma concentration; AUC<sub>0-last</sub>, area under the plasma concentration-time curve between time zero and the last measurable concentration; CL, clearance; PE, calculated prediction error (%) = [(predicted value - observed value)/observed value] × 100.

**Table S5. Input parameters of dofetilide in PBPK model.**

| Input parameters                                 | Description                                           | Units                 | Value           | Reference        |
|--------------------------------------------------|-------------------------------------------------------|-----------------------|-----------------|------------------|
| <b>1. Physicochemical and binding properties</b> |                                                       |                       |                 |                  |
| MW                                               | Molecular weight                                      | g/mol                 | 441.57          | PubChem          |
| Log P                                            | Octanol-water partition                               | -                     | 2.1             |                  |
| Compound type                                    | Acid,base or neutral                                  | -                     | Monoprotic base |                  |
| pK <sub>a</sub>                                  | Acid dissociation constant                            | -                     | 7.89            | UWDIDB           |
| B/P profile                                      | Blood to plasma ratio dependent on drug concentration | -                     | 1.048           | Simcyp predicted |
| f <sub>u</sub>                                   | Fraction unbound in plasma                            | -                     | 0.36            | UWDIDB           |
| <b>2. Absorption</b>                             |                                                       |                       |                 |                  |
| Absorption model                                 | First order absorption model                          |                       |                 |                  |
| f <sub>a</sub>                                   | Fraction available from dosage form                   | -                     | 1               | Default          |
| CV f <sub>a</sub>                                | Coefficient of variation f <sub>a</sub>               | %                     | 30              |                  |
| k <sub>a</sub>                                   | Absorption rate constant                              | 1/h                   | 0.9             |                  |
| CV k <sub>a</sub>                                | Coefficient of variation k <sub>a</sub>               | %                     | 30              | Default          |
| f <sub>u,gut</sub>                               | Unbound fraction in enterocytes                       | -                     | 0.039           | Simcyp predicted |
| Q <sub>gut</sub>                                 | Nominal flow in gut model                             | L/h                   | 4.068           | Simcyp predicted |
| CV Q <sub>gut</sub>                              | Coefficient of variation Q(gut)                       | %                     | 30              | Default          |
| P <sub>eff,man</sub>                             | Effective permeability in man                         | 10 <sup>-4</sup> cm/s | 12              | Simcyp predicted |
| Permeability assay                               | Passive + active permeability                         |                       | Physicochemical |                  |
| PSA                                              | Polar surface area                                    | Å <sup>2</sup>        | 104.81          | Drug central     |
| HBD                                              | Hydrogen bond donor                                   |                       | 2               | Drug central     |
| <b>3. Distribution</b>                           |                                                       |                       |                 |                  |
| Distribution model                               | Full PBPK model                                       |                       |                 |                  |
| Prediction method                                |                                                       |                       | Method 2        |                  |
| K <sub>p</sub> scalar                            | Tissue to plasma partition coefficient                |                       | 0.61            | Optimized        |

| Input parameters      | Description                                         | Units                                      | Value           | Reference             |
|-----------------------|-----------------------------------------------------|--------------------------------------------|-----------------|-----------------------|
| $V_{ss}$              | Volume of distribution at steady-state              | L/kg                                       | 2.8             | Smith et al 1992 [16] |
| CV $V_{ss}$           | Coefficient of variation $V_{ss}$                   | %                                          | 30              | Default               |
| <b>4. Elimination</b> |                                                     |                                            |                 |                       |
| Elimination model     | Enzyme kinetics                                     |                                            |                 |                       |
| CYP, recombinant      |                                                     |                                            | CYP3A4          | Smith et al 1992 [16] |
| $CL_{int}$ (HLM)      | <i>In vitro</i> clearance (human liver microsomes)  | $\mu\text{L}/\text{min}/\text{mg}$ protein | 0.25            | Smith et al 1992 [16] |
| $f_{umic}$            | Fraction unbound <i>in vitro</i>                    |                                            | 0.81            |                       |
| $CL_r$                | Renal clearance in 20-30yr healthy male             | L/h                                        | 18.06           | Smith et al 1992 [16] |
| <b>5. Transport</b>   |                                                     |                                            |                 |                       |
| Organ/Tissue          |                                                     |                                            | Kidney          |                       |
| Transporter           |                                                     |                                            | SLC22A2 (OCT2)  |                       |
| Location              |                                                     |                                            | Basolateral     |                       |
| Function              |                                                     |                                            | EGD model       |                       |
| $J_{max}$             |                                                     | $\text{pmol}/\text{min}/10^6$ cells        | 506.35          | Measured              |
| $K_m$                 | Michaelis-Menten constant                           | $\mu\text{M}$                              | 347.2           | Measured              |
| System                |                                                     |                                            | User            |                       |
| RAF/REF               | Relative activity factor/relative expression factor |                                            | 1               | Optimized             |
| $CL_{PD}$ basal       | Passive diffusion clearance                         | $\text{mL}/\text{min}/10^6$ cells          | 0               |                       |
| Transporter           |                                                     |                                            | SLC47A1 (MATE1) |                       |
| Location              |                                                     |                                            | Apical          |                       |
| Function              |                                                     |                                            | Efflux          |                       |
| $CL_{int}$            | Intrinsic clearance                                 | $\mu\text{L}/\text{min}/10^6$ cells        | 22.2            | Measured              |
| System                |                                                     |                                            | User            |                       |
| RAF/REF               | Relative activity factor/relative expression factor |                                            | 0.25            | Optimized             |

| Input parameters        | Description                 | Units                        | Value | Reference |
|-------------------------|-----------------------------|------------------------------|-------|-----------|
| CL <sub>PD</sub> apical | Passive diffusion clearance | mL/min/10 <sup>6</sup> cells | 0     |           |

Drug central, <https://drugcentral.org/drugcard/942>

UWDIDB, University of Washington Drug Interaction Database

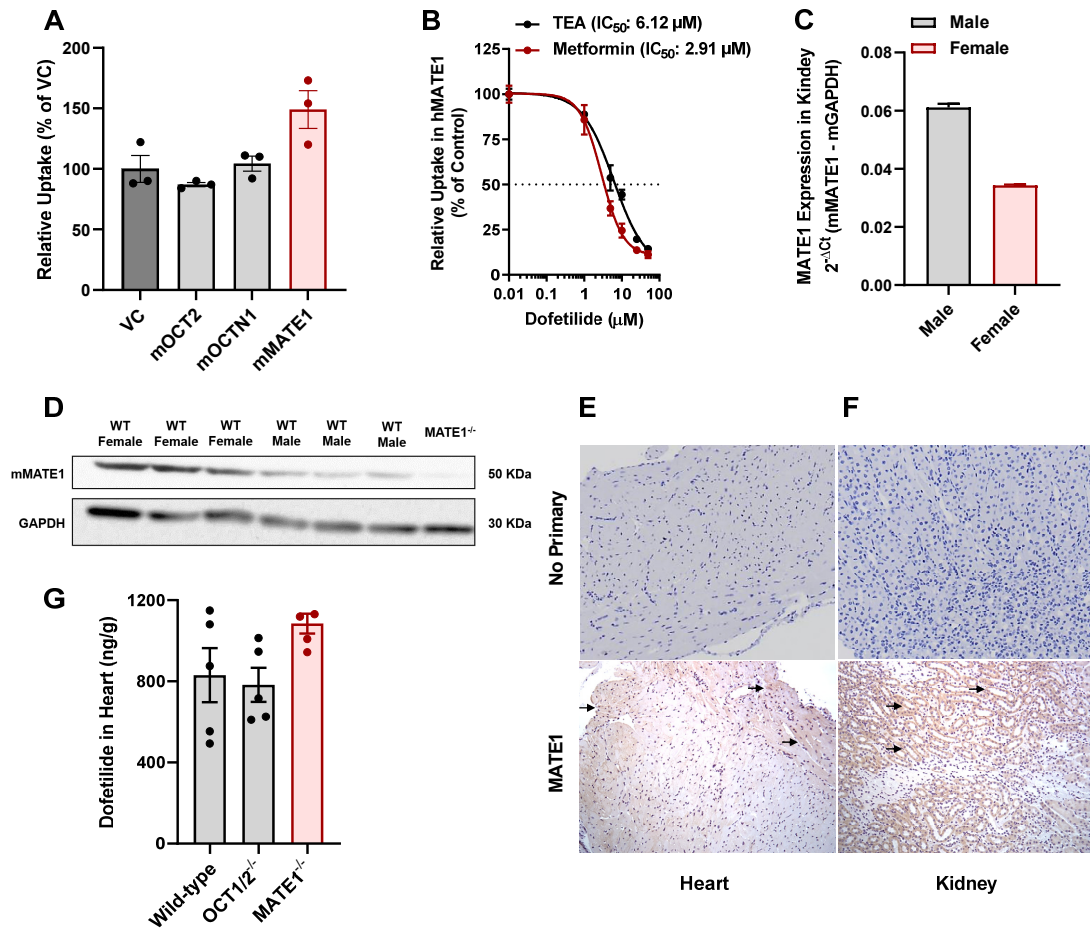

**Figure S1. Influence of MATE1 on the transport of dofetilide.** (A) Transport of [ $^3$ H] dofetilide (1  $\mu$ M) in cells overexpressing mouse (m) OCT2, OCTN1, or MATE1. Relative uptake is expressed as percentage change compared with empty vector controls (n = 3). (B) Uptake of [ $^{14}$ C] TEA (2  $\mu$ M) and [ $^{14}$ C] metformin (5  $\mu$ M) in HEK293 cells overexpressing human (h) MATE1 after preincubation with dofetilide at various concentrations (1-50  $\mu$ M) for 15 min, followed by the co-incubation with TEA and metformin for 15 min. Data represent the mean  $\pm$  SEM and are expressed as a percentage over vector control. (C) Gene expression of MATE1 in the kidney isolated from untreated male and female wild-type mice (n = 4 per group). (D) Protein expression of MATE1 in the heart isolated from untreated wild-type (WT) and MATE1<sup>-/-</sup> mice (n=3). Immunohistochemical detection of MATE1 (bottom panels) in the wild-type mouse heart (E) and kidney (F). Tissue staining lacking the primary antibody was performed as a negative control for each tissue group (top panels). Representative images were taken at x40 magnification. (G) Concentration of dofetilide in whole heart tissue from male wild-type, OCT1/2-deficient, and MATE1-deficient mice 15 min after a single i.v. injection of dofetilide at a dose of 2.5 mg/kg (n = 4-5 per group).



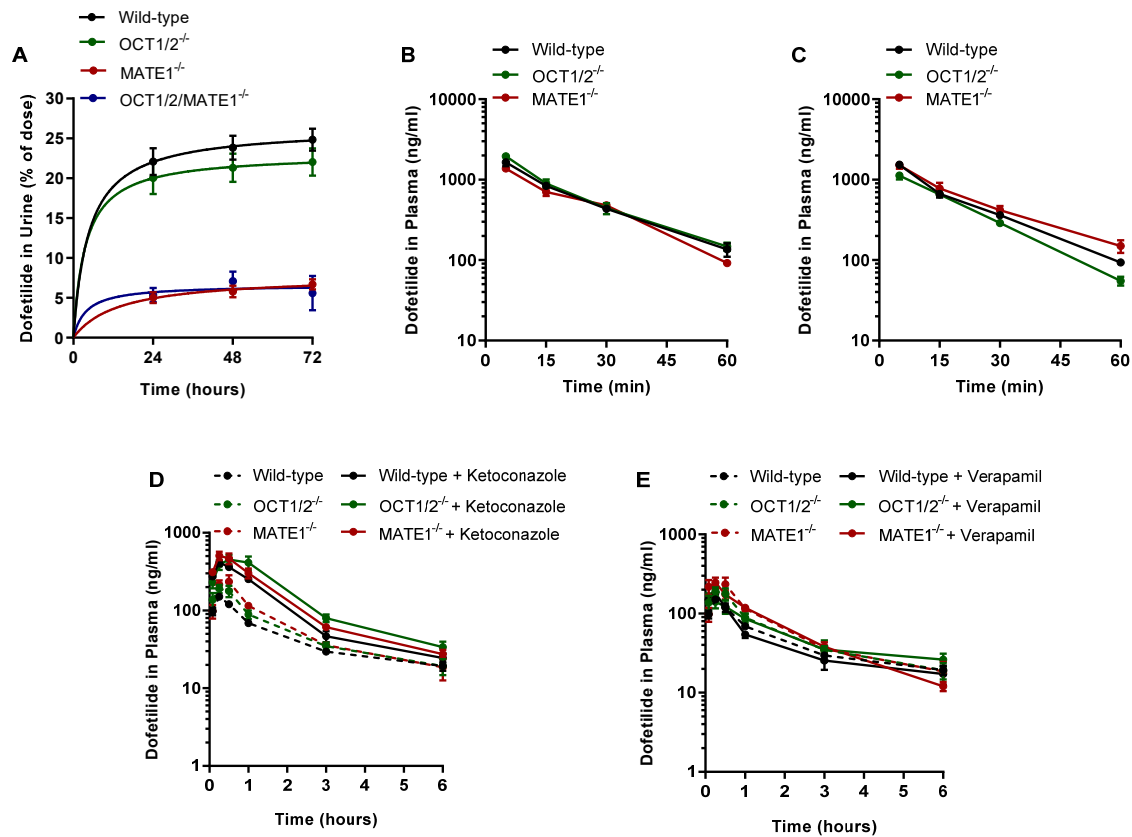

**Figure S2. Influence of mouse genotype and ketoconazole or verapamil treatment on the pharmacokinetics of dofetilide.** (A) Urinary excretion of dofetilide in male wild-type, OCT1/2-deficient, MATE1-deficient, and OCT1/2/MATE1-deficient mice (n = 5) following an i.v. dose of dofetilide (2.5 mg/kg). Plasma concentration time profiles of dofetilide in female (B) and male (C) wild-type, OCT1/2-deficient, and MATE1-deficient mice (n = 5 per group) receiving a single i.v. dose of dofetilide (2.5 mg/kg). Plasma concentration time profiles of dofetilide in wild-type, OCT1/2-deficient, and MATE1-deficient male mice (n = 5 to 38 per group) receiving an oral dose of dofetilide (5 mg/kg) 30 min after the administration of ketoconazole (50 mg/kg) (D) or verapamil (10 mg/kg) (E).

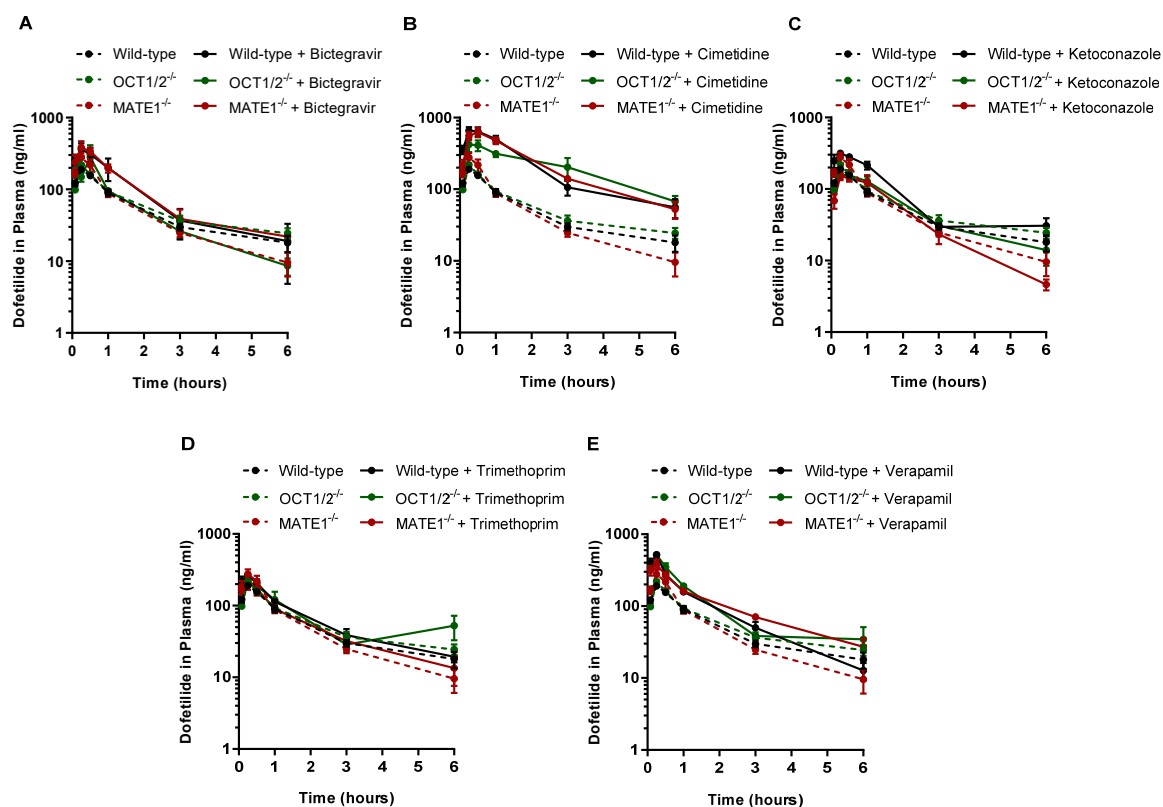

**Figure S3. Drug-drug interactions between dofetilide and contraindicated drugs.** Plasma concentration time profiles of dofetilide in female wild-type, OCT1/2-deficient, and MATE1-deficient mice (n = 5 to 29 per group) receiving a single oral dose of dofetilide (5 mg/kg) 30 min after the administration of bicitegravir (30 mg/kg) (A), cimetidine (100 mg/kg) (B), ketoconazole (50 mg/kg) (C), trimethoprim (100 mg/kg) (D), or verapamil (10 mg/kg) (E).

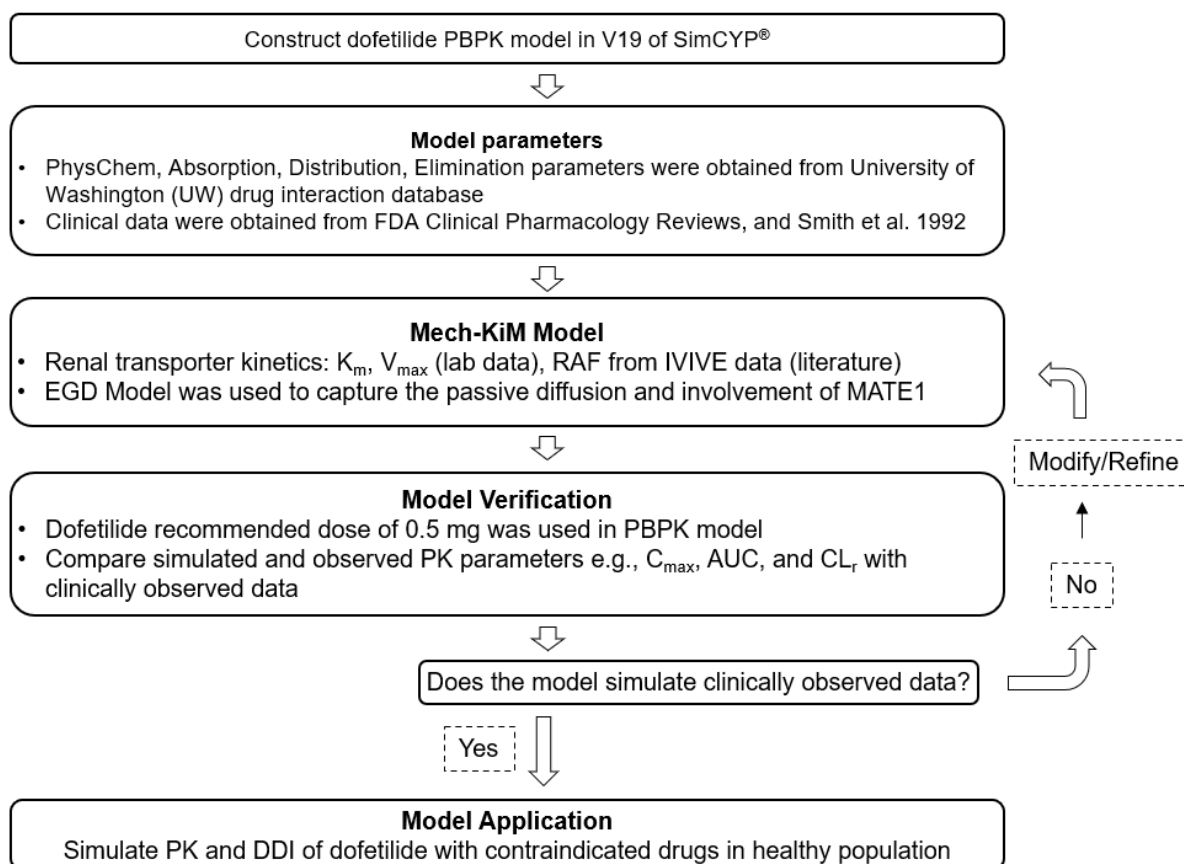

**Figure S4. Workflow of the development of physiologically based pharmacokinetic (PBPK) model.**

*Abbreviations:* AUC, area under the curve;  $C_{max}$ , peak plasma concentration;  $CL_r$ , clearance; FDA, U.S. Food and Drug Administration; IVIVE, *in vitro* to *in vivo* extrapolation;  $K_m$ , Michaelis-Menten constant; RAF, relative activity factor; PK, pharmacokinetics;  $V_{max}$ , maximum velocity.
